# Supplementary figures and images for: Identifying Protein Features Responsible for Improved Drug Repurposing Accuracies Using The CANDO Platform: Implications for Drug Design
Source: Preprints.org preprint supplement (doi:10.20944/preprints201811.0429.v1), 2018-11-19

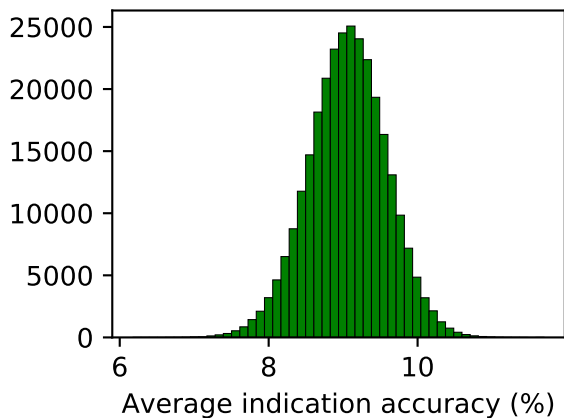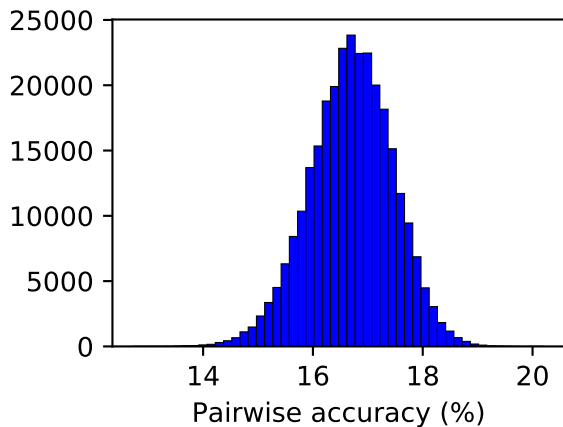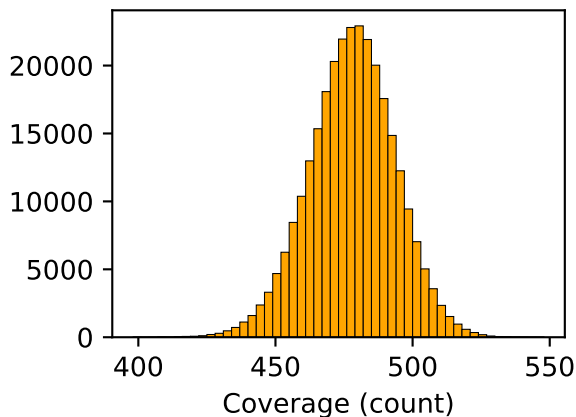

Supplement: Supplementary file 1 [file supplementary]
